# Supplementary material for: Comparison between Immunocytochemistry, FISH and NGS for ALK and ROS1 Rearrangement Detection in Cytological Samples
Source: MDPI journal article supplement (doi:10.3390/ijms231810556), 2022-09-12
Supplement: s1 [file s1]

Table S3. Samples repartition.

| Cytological sample specimen types             | ALK                             |                                                      |                                | ROS1                           |                                                      |                     |
|-----------------------------------------------|---------------------------------|------------------------------------------------------|--------------------------------|--------------------------------|------------------------------------------------------|---------------------|
|                                               | NGS                             | ICC                                                  | FISH*                          | NGS                            | ICC                                                  | FISH*               |
| EBUS-TBNA lymph nodes (n=59)                  | Neg = 47<br>Pos = 6<br>NE = 6   | Neg = 35<br>Pos (+ to +++) = 5<br>NI = 2<br>NP = 17  | Neg = 2<br>Pos n = 4<br>NE = 2 | Neg = 53<br>NE = 6             | Neg = 41<br>NI = 2<br>NP = 16                        | Neg = 2             |
| Pleural (n=45)                                | Neg = 35<br>Pos = 9<br>NE = 1   | Neg = 27<br>Pos (+ to +++) = 12<br>NI = 2<br>NP = 4  | Neg = 8<br>Pos = 9             | Neg = 41<br>Pos = 3<br>NE = 1  | Neg = 30<br>Pos (+ to +++) = 10<br>NI = 1<br>NP = 4  | Neg = 8<br>Pos = 2  |
| EBUS-TBNA mediastinal or pulmonary mass (n=9) | Neg = 9                         | Neg = 4<br>Pos (+ to +++) = 1<br>NP = 4              | Neg = 1                        | Neg = 9                        | Neg = 4<br>Pos (+ to +++) = 1<br>NP = 4              | Neg = 1             |
| Pericardial (n=7)                             | Neg = 7                         | Neg = 7                                              |                                | Neg = 7                        | Neg = 4<br>Pos (+ to +++) = 3                        | Neg = 3             |
| Bronchial brush (n=5)                         | Neg = 5                         | Neg = 4<br>NP = 1                                    | /                              | Neg = 5                        | Neg = 3<br>Pos (+ to +++) = 1<br>NP = 1              | Neg = 1             |
| BAL (n=4)                                     | Neg = 4                         | Neg = 2<br>NP = 2                                    | /                              | Neg = 4                        | Neg = 2<br>NP = 2                                    | /                   |
| CSF (n=2)                                     | Neg = 1<br>NE = 1               | NP = 2                                               | /                              | Neg = 1<br>NE = 1              | NP = 2                                               | /                   |
| Total (n=131)                                 | Neg = 108<br>Pos = 15<br>NE = 8 | Neg = 79<br>Pos (+ to +++) = 18<br>NI = 4<br>NP = 30 | Neg = 11<br>Pos = 13<br>NE = 2 | Neg = 120<br>Pos = 3<br>NE = 8 | Neg = 84<br>Pos (+ to +++) = 15<br>NI = 3<br>NP = 29 | Neg = 13<br>Pos = 2 |

ICC: Immunocytochemistry; FISH: Fluorescence *in situ* hybridization; NGS: Next Generation Sequencing; NE: Not exploitable; Neg: negative; Pos: positive; NP: not performed; NI: not interpretable. \*FISH was only performed when the result of ICC was + to +++ and when the material was still available.
